# Supplementary material
Source: Springer Nature journal article supplement (https://www.springermedizin.de/resource/supplementary/12967_2011_961_MOESM3_ESM.pdf/9577282)

**A.**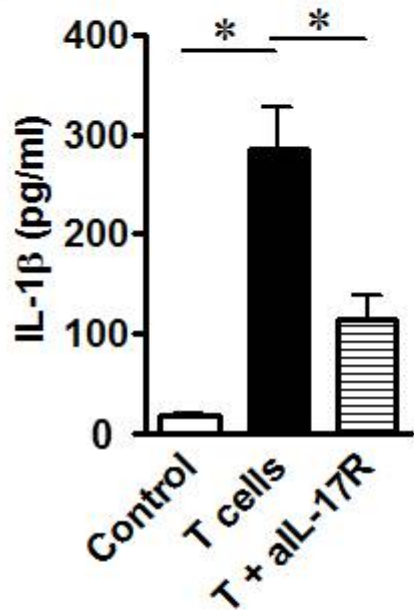**B.**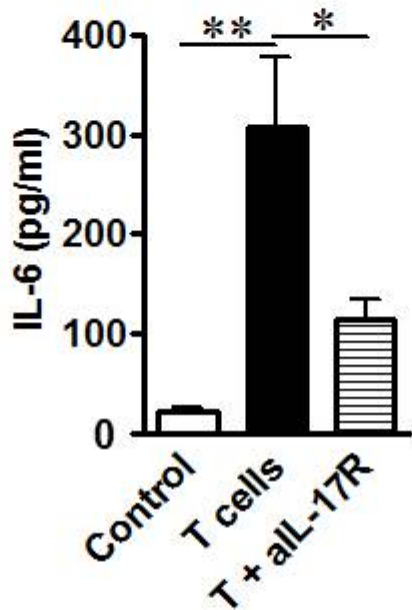**C.**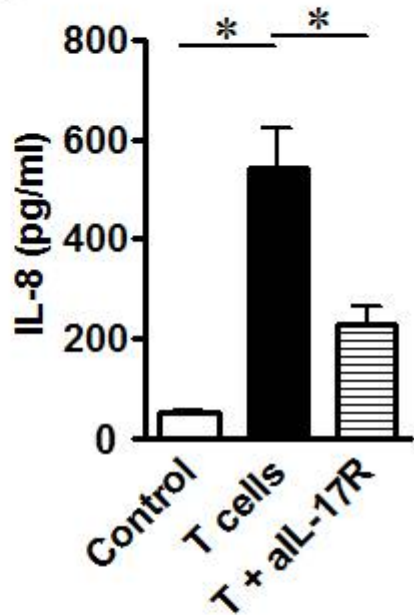

Supplement: MOESM3 [file 9577282]
